# Supplementary material for: c-Myc Regulates Self-Renewal in Bronchoalveolar Stem Cells
Source: PLoS One. 2011 Aug 17;6(8):e23707. doi: 10.1371/journal.pone.0023707 (PMC3157444; doi:10.1371/journal.pone.0023707)
Supplement: Table S1 — Primer sequences for real-time PCR. (XLS) [file pone.0023707.s001.xls]

## Sheet: Table S1
Table S1
C-Myc:
	upstream	GAACTTACAATCTGCGAGCC
	downstream	AGTCGAGGTCATAGTTCCTG
Prmt1:
	upstream	GGTTACTGCCTCTTCTACGA
	downstream	CTGTGTAAATGTCCACCTCC
BAF155:
	upstream	TGATCTTCAGAACCCATCCC
	downstream	CTCTCCTCATCACTGGTCTC
Trim28:
	upstream	CACAAGGACCATCAGTACCA
	downstream	GGCATCATTGACCAGAACTC
Mybbp 1a:
	upstream	ATGTTCCTCAGCCTCTTCTC
	downstream	ATGGATAGCTCCTTCTGGTG
Btbd14a:
	upstream	ACAACGAGGAGGATGAAGAG
	downstream	TCTGAGTAGAGCTTTGGGTG
Ipo7
	upstream	CACTTACGTGGAAGAACCTG
	downstream	TTGAGCAGCAGTAGTAGGAG
Usp1
	upstream	AGATTGACCAAGTTGTTCCTG
	downstream	TCACTCCAGTCTTAAAGCCA
Plk4
	upstream	TCATTCCTCTGATAGAGCCA
	downstream	TGCTGTACCATTTCCATCTG
Tnc
	upstream	CAGACAGACAACAGCATCAC
	downstream	GACAGCAGAAACACCAATCC
Sox2
	upstream	GCT GGG AGA AAG AAG AGG AG
	downstream	ATC TGG CGG AGA ATA GTT GG
Klf4
	upstream	CCA ACT ACC CTC CTT TCC TG
	downstream	CAC AGT GGT AAG GTT TCT CG
Nanog
	upstream	TAC AAG GGT CTG CTA CTG AG
	downstream	CTG AGG TAC TTC TGC TTC TG
b-Catenim
	upstream	CAC AGG ATT ACA AGA AGC GG
	downstream	CTC ATG CTC CAT CAT AGG GT
Dppa4
	upstream	CTG GGA GAA CTT TCT TTC GG
	downstream	CTT CCT ACG AGT CTG TCC TG
Rest
	upstream	CAC CTG AGA AAC CAT TTC CC
	downstream	GTG AAC CTG TCT TGC ATG TC
Pou5f1
	upstream	TTG GGC TAG AGA AGG ATG TG
	downstream	AAG GGA CTG AGT AGA GTG TG
Rail4
	upstream	AGT TGA GTG ATG TGT CCT CC
	downstream	GTG TAA GGT AAG GGA AGC GA
Rnf2
	upstream	AGG AAA GGG TCT TAG CAA GG
	downstream	TTC AAG CCC AGA GTC ATC AG
Zfp609
	upstream	GCC AAG TCT GTC ATC ATT CC
	downstream	CTC TTT CCA CCG ATC ATC CT
Dppa2
	upstream	AAA GAG AAG AGG GTG GAG AG
	downstream	GTA GCG TAG TCT GTG TTT GG
Stat3
	upstream	AGA TTG ACC TAG AGA CCC AC
	downstream	TGA CAC CCT GAG TAG TTC AC
Nr0b1
	upstream	CAG GAA ATG CTT ACC ACC AG
	downstream	GTT CTC CAC TGA AGA CCC TC
Hdac2
	upstream	CCA GTT GAG TGA TGT GTC CT
	downstream	TGT AAG GTA AGG GAA GCG AC
Smarcad1
	upstream	CCA AGA AGG ATC GGA TTG AG
	downstream	CTT CAA AGA TCA GGT CAG GG
Wfdc5
	upstream	CTT ACA ACT CAT GCC TCC TG
	downstream	GTG GAT GGA CTG ATG TTT GG
Wdr18
	upstream	CAG GGC AAG AAC TAC ATC TG
	downstream	GTA AAC TTC AGG CAG GAC AC
Ecat1
	upstream	GAG TTT GCA TAG GCT TCC TG
	downstream	AAG ATG TGG GAT GTG CTC TC
Ftl117
	upstream	TGG CTG AGT ACC TCT TTG AC
	downstream	GCA ACA GTC CAT CAG AAA CC
Grb2
	upstream	AGT ATT TCC TGT GGG TGG TG
	downstream	GAA TGA AGT CTC CTC TGC GA
Zfp281
	upstream	AGA GAC ATC ATC AGC CTT CC
	downstream	CCC GAC TTA AAC TGA GAA CC
Pelo2
	upstream	GTA CAT TCC ACG CAT TCC AC
	downstream	CTC TTT CCC TAC CAG CAC TC
Dpf2
	upstream	CCG ATG ACT TCC TTG ATG AC
	downstream	TCT TTG TCC TCT CCT TCC TC
Esrrb
	upstream	CAA CAT CGA GTA CAA CTG CC
	downstream	GCA TAG CAT ACA GCT TGT CC
Btbd14b
	upstream	CCA AAG CTC TAC GAT GAA GG
	downstream	GTA CTT GAC AGC ATG GAG GA
Dppa5
	upstream	GGT CTT CAT TTA CGG CTC TC
	downstream	GAC ACA AGG ACT GGA AAC TG
Sox15
	upstream	CTT TAG CCA AGA AGG AGG TG
	downstream	TAT GGA GTG GAA GAG TCT GG
Zfp42
	upstream	GAA ATG GAC TAA GAG CTG GG
	downstream	TGC CTA TGA CTC ACT TCC AG
Ewsr1
	upstream	GCA CCT CCA TCT TAT CCT CC
	downstream	AGA CTC CTG CCC ATA AAC AC
Sall4
	upstream	AGA ACT TCT CGT CTG CCA
	downstream	CTC TTT CCC TCA GCA CTC
Rif1
	upstream	GTG TCT GCT AGT TCA AGT GG
	downstream	GAG CAA CGC CTA TCA ATG TC
Fbxo15
	upstream	GTA GCA CCT TCC ACA ATC TC
	downstream	CAT CCA GCA AGG TCA TAT CC
Utf1
	upstream	TCA AGG ACA AAC TCC GAG AC
	downstream	GGA AGA ACT GAA TCT GAG CG
Sall1
	upstream	CAA CAT TTC CAA TCC GAC CC
	downstream	TGG TCA TCG GGA TCA TTG AG
Dnmt31
	upstream	ATT ACG TCC TCA TCC CTA CC
	downstream	AGT CTT CCA GTA CCA CAT CC
ILF2
	upstream	CTA CAC AGC TCA GAC TCT GG
	downstream	CAG TAA AGG GAA GGT CAC TC
Gdf3
	upstream	GGA CTT ATG CTA CGT GAA GG
	downstream	TGG TCG CAG GTT ATA GTA GG
Zfp219
	upstream	ACA CGT CTC CAA CCT ATG TC
	downstream	CTG CTC TAC CCA ACT ACC TC
Arid3b
	upstream	CTT TGG CTA TTC TCC TGC TG
	downstream	TCC ATC ACC TTT CCT GAG AG
Tcl1
	upstream	GCT TGA ACT GAT AGA CTC GG
	downstream	AGA ACT GGG ATC TTC TCT GG
Zmym2
	upstream	GGC GTT AAG AGA CCT TTC TG
	downstream	GGG ATT TAC AGC AGT CAC AC
Dappa3
	upstream	CGT CCT ACA ACC AGA AAC AC
	downstream	CTG CTC AAT CCG AAC AAG TC
Rybp
	upstream	AGC CAG AGA AAG ACA AGG AC
	downstream	CTG TGG AAG AGG ATG TGG AG
Yy1
	upstream	GGA ATA AGA AGT GGG AGC AG
	downstream	AGT TGC TTA GGG TCT GAG AG
Arid3a
	upstream	CAA CAA GAA ACT GTG GAG GG
	downstream	GTG AGT AGG CAA AGA GTG AG
Gatad2b
	upstream	GCA GTG TAT GAC TTC CAA CC
	downstream	GTT TGA AAG CAT GGA TCG GG
Ecat8
	upstream	ACA TCC GAG TTG CAG TAG AG
	downstream	AGT ATC TTC TTC CAC CGC AC
b-Actin
	upstream	CTT GGG TAT GGA ATC CTG TG
	downstream	GAT CTT CAT GGT GCT AGG AG
Gapdh
	upstream	CAT CAA GAA GGT GGT GAA GC
	downstream	TGG TCC AGG GTT TCT TAC TC
